# Supplementary material for: Periphyton Phosphorus Uptake in Response to Dynamic Concentrations in Streams: Assimilation and Changes to Intracellular Speciation
Source: PubMed Central journal article supplement — Environ Sci Technol. 2023 Mar 10;57(11):4643–55. doi: 10.1021/acs.est.2c06285 (PMC10035032; doi:10.1021/acs.est.2c06285), 2023-03-10
Supplement: es2c06285_si_001.pdf [file es2c06285_si_001.pdf]

## Supplementary Information for

### **Periphyton phosphorus uptake in response to dynamic concentrations in streams: Assimilation and changes to intracellular speciation**

Nolan J. T. Pearce\*, Chris T. Parsons, Sarah M. Pomfret, Adam G. Yates

\*Corresponding author. Email: [nolanpearce@trentu.ca](mailto:nolanpearce@trentu.ca)

#### **This PDF file includes:**

Figures S1 to S3  
Tables S1 to S4

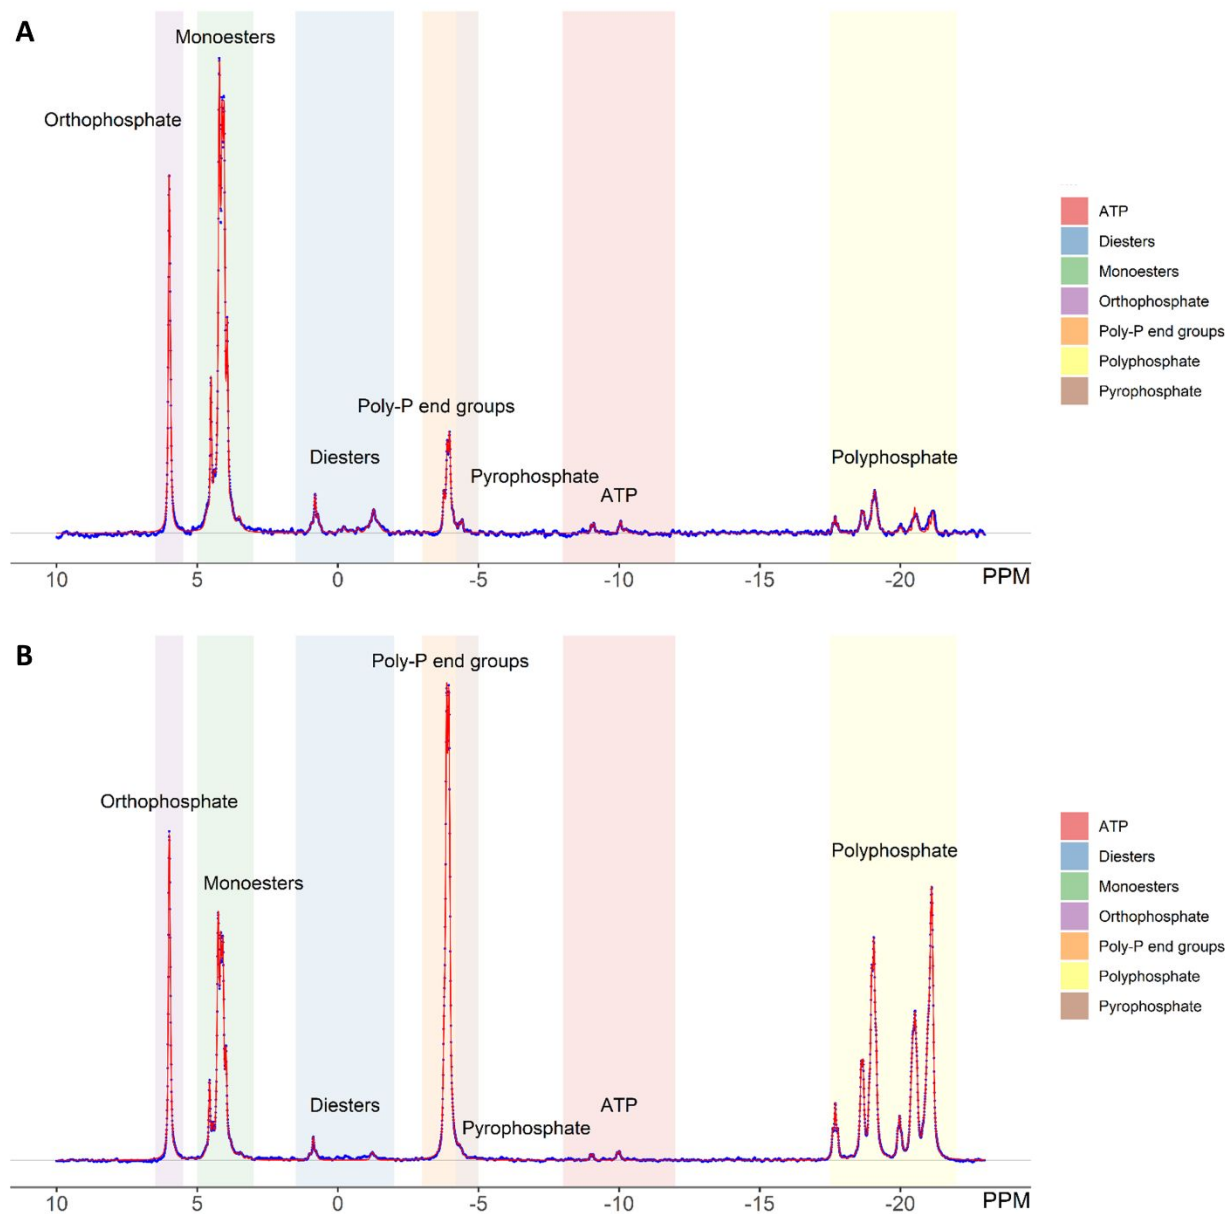

**Figure S1.**

Examples of  $^{31}\text{P}$  NMR spectra obtained from periphyton sampled 1-day after receiving 48 hour experimental P pulses. “A” was obtained from periphyton that received a pulse of  $25 \mu\text{g L}^{-1}$  SRP, “B” was obtained from periphyton that received a pulse of  $700 \mu\text{g L}^{-1}$  SRP. P compound assignments are shown with colored panels. Raw data are shown with blue circles, the sum of fitted peaks is shown with a solid red line.

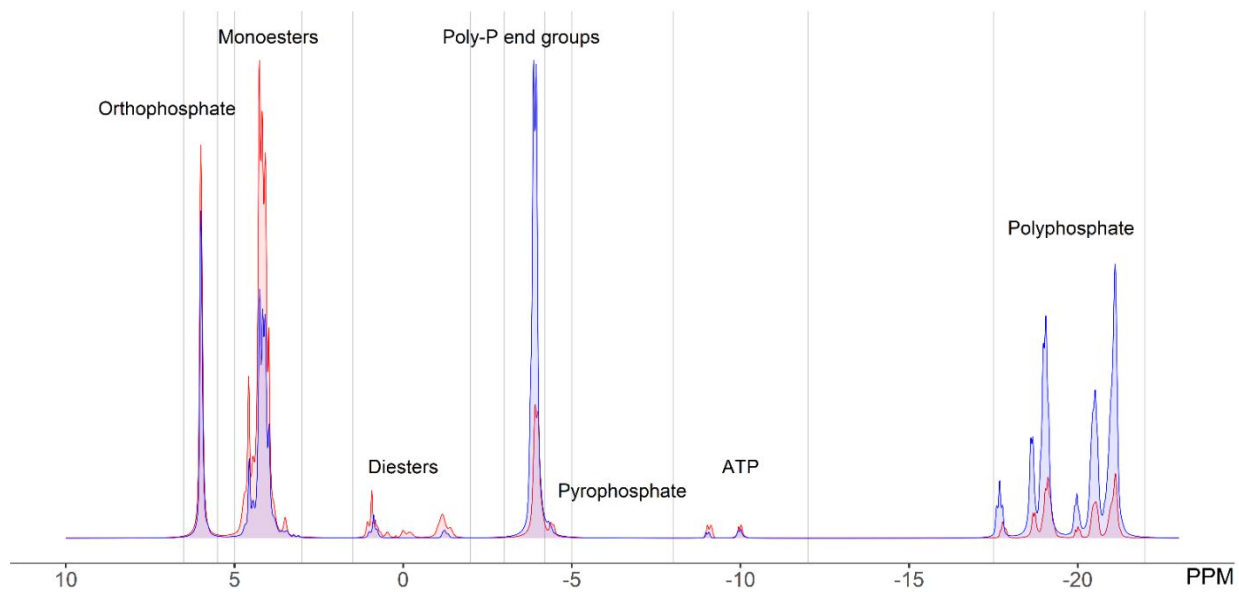

**Figure S2.**

Comparison of  $^{31}\text{P}$  NMR spectra, normalized by total P concentration, obtained 1 and 10 days after a 48-hour experimental pulse of  $700 \mu\text{g L}^{-1}$  SRP (blue and red, respectively).

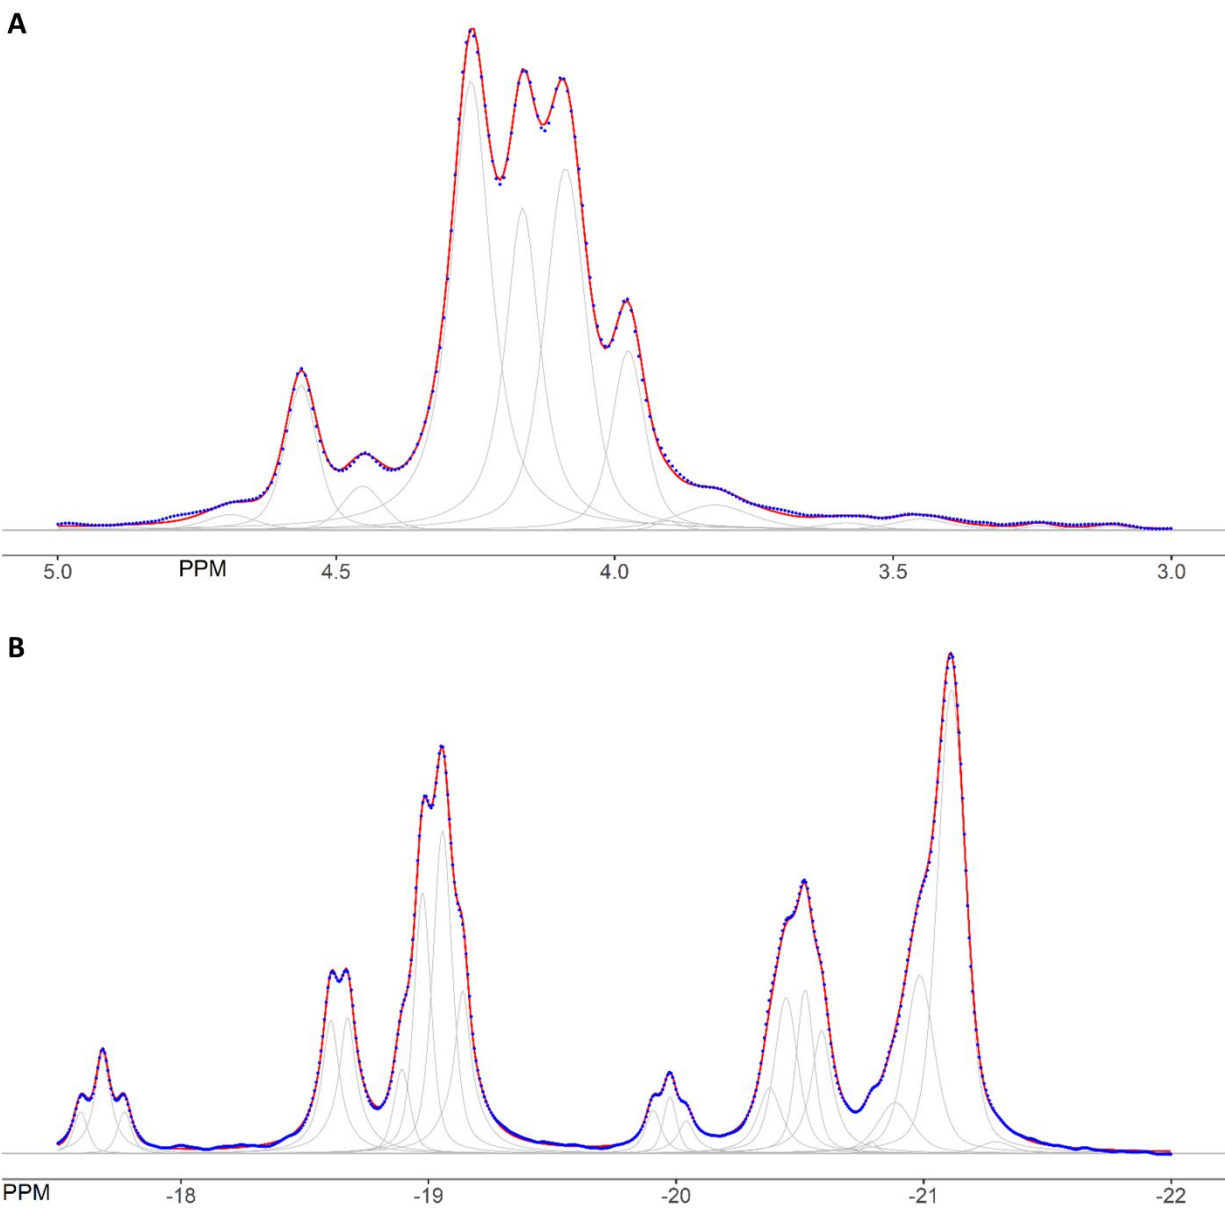

**Figure S3.**

Examples of fitting for regions of  $^{31}\text{P}$  NMR spectra obtained 1-day after a 48-hour experimental pulse of  $700 \mu\text{g L}^{-1}$  SRP. “A” corresponds to the monoester-P region, “B” corresponds to the polyphosphate region. Raw data are shown with blue circles, the sum of fitted peaks is shown with a solid red line.

**Table S1.**

Location, total phosphorus (TP), and total nitrogen (TN) status of streams used to inoculate artificial streams. Values represent average concentrations based on available data from the Ontario Provincial Water Quality Monitoring Network.

| <b>Stream Name</b> | <b>Location</b>       | <b>Strahler Order</b> | <b>TP (mg L<sup>-1</sup>)</b> | <b>TN (mg L<sup>-1</sup>)</b> |
|--------------------|-----------------------|-----------------------|-------------------------------|-------------------------------|
| Medway Creek       | 43.013107, -81.280427 | 5                     | 0.020                         | 3.33                          |
| Waubuno Creek      | 42.994523, -81.116698 | 4                     | 0.025                         | 4.39                          |
| Reynolds Creek     | 42.969076, -80.949771 | 4                     | 0.191                         | 3.10                          |
| Middle Thames      | 43.031385, -80.998540 | 6                     | 0.046                         | 4.17                          |
| South Thames       | 43.018638, -80.92706  | 5                     | 0.122                         | 4.99                          |
| South Thames       | 43.126534, -80.779388 | 5                     | 0.158                         | 5.38                          |

**Table S2.**

Strength of periphyton phosphorus content regression models for samples collected 1-day before (Before), 1-day after (After), and 10-days after (End) experimental P additions. Second order Akaike's information criteria values (AICc), AICc differences relative to the best model ( $\Delta$ AICc), AICc weights (AICw), log-likelihood values (LL), number of estimated parameters (k), and residual deviance (Residual Dev.) are shown for each model. Bolded text represents the most plausible model.

| P Content         | Model           | k        | LL           | AICc          | $\Delta$ AICc | AICw        | Residual Dev.                |
|-------------------|-----------------|----------|--------------|---------------|---------------|-------------|------------------------------|
| Before            | <b>Null</b>     | <b>2</b> | <b>25.81</b> | <b>-45.62</b> | <b>0.00</b>   | <b>0.73</b> | <b>1.70 x10<sup>-3</sup></b> |
|                   | Linear          | 3        | 27.17        | -43.55        | 2.07          | 0.26        | 1.26 x10 <sup>-3</sup>       |
|                   | Asymptotic      | 4        | 27.25        | -36.50        | 9.12          | < 0.01      | 1.24 x10 <sup>-3</sup>       |
|                   | Logistic        | 4        | 27.26        | -36.52        | 9.10          | < 0.01      | 1.23 x10 <sup>-3</sup>       |
| After             | Null            | 2        | 2.23         | 1.55          | 26.02         | < 0.01      | 3.21 x10 <sup>-1</sup>       |
|                   | Linear          | 3        | 13.58        | -16.36        | 8.12          | 0.02        | 2.58 x10 <sup>-2</sup>       |
|                   | Asymptotic      | 4        | 17.24        | -16.49        | 7.99          | 0.02        | 1.14 x10 <sup>-2</sup>       |
|                   | <b>Logistic</b> | <b>4</b> | <b>21.24</b> | <b>-24.48</b> | <b>0.00</b>   | <b>0.97</b> | <b>4.70 x10<sup>-3</sup></b> |
| End               | Null            | 2        | 9.81         | -13.62        | 25.30         | < 0.01      | 5.96 x10 <sup>-2</sup>       |
|                   | <b>Linear</b>   | <b>3</b> | <b>24.86</b> | <b>-38.92</b> | <b>0.00</b>   | <b>0.73</b> | <b>2.10 x10<sup>-3</sup></b> |
|                   | Asymptotic      | 4        | 27.18        | -36.36        | 2.56          | 0.20        | 1.25 x10 <sup>-3</sup>       |
|                   | Logistic        | 4        | 26.01        | -34.02        | 4.90          | 0.06        | 1.63 x10 <sup>-3</sup>       |
| <b>P Uptake</b>   |                 |          |              |               |               |             |                              |
| After –<br>Before | Null            | 2        | -0.50        | 7.00          | 14.95         | < 0.01      | 5.89 x10 <sup>-1</sup>       |
|                   | Linear          | 3        | 9.08         | -7.36         | 0.59          | 0.36        | 7.00 x10 <sup>-2</sup>       |
|                   | Asymptotic      | 4        | 11.81        | -5.62         | 2.33          | 0.15        | 3.82 x10 <sup>-2</sup>       |
|                   | <b>Logistic</b> | <b>4</b> | <b>12.98</b> | <b>-7.95</b>  | <b>0.00</b>   | <b>0.49</b> | <b>2.95 x10<sup>-2</sup></b> |
| End –<br>After    | <b>Null</b>     | <b>2</b> | <b>20.62</b> | <b>-35.23</b> | <b>0.00</b>   | <b>0.89</b> | 5.40 x10 <sup>-3</sup>       |
|                   | Linear          | 3        | 20.89        | -30.99        | 4.25          | 0.11        | 5.07 x10 <sup>-3</sup>       |
|                   | Asymptotic      | 4        | 20.48        | -22.96        | 12.27         | < 0.01      | 5.56 x10 <sup>-3</sup>       |
|                   | Logistic        | 4        | 19.07        | -20.15        | 15.09         | < 0.01      | 7.61 x10 <sup>-3</sup>       |

**Table S3.**

Strength of periphyton phosphorus species regression models for samples collected 1-day after (After), and 10-days after (End) experimental P additions. Second order Akaike's information criteria values (AICc), AICc differences relative to the best model ( $\Delta$ AICc), AICc weights (AICw), log-likelihood values (LL), number of estimated parameters (k), and residual deviance (Residual Dev.) are shown for each model. Bolded text represents the most plausible model.

| Poly-P     | Model           | k        | LL           | AICc          | $\Delta$ AICc | AICw        | Residual Dev.                |
|------------|-----------------|----------|--------------|---------------|---------------|-------------|------------------------------|
| After      | Null            | 2        | 4.05         | -2.10         | 27.70         | < 0.01      | 2.14 x10 <sup>-1</sup>       |
|            | Linear          | 3        | 18.98        | -27.16        | 2.63          | 0.13        | 7.76 x10 <sup>-3</sup>       |
|            | Asymptotic      | 4        | 23.72        | -29.43        | 0.36          | 0.40        | 2.71 x10 <sup>-3</sup>       |
|            | <b>Logistic</b> | <b>4</b> | <b>23.90</b> | <b>-29.79</b> | <b>0.00</b>   | <b>0.48</b> | <b>2.60 x10<sup>-3</sup></b> |
| End        | Null            | 2        | 19.14        | -32.28        | 36.80         | < 0.01      | 7.49 x10 <sup>-3</sup>       |
|            | <b>Linear</b>   | <b>3</b> | <b>39.94</b> | <b>-69.08</b> | <b>0.00</b>   | <b>0.91</b> | <b>7.36 x10<sup>-5</sup></b> |
|            | Asymptotic      | 4        | 39.63        | -61.26        | 7.82          | 0.02        | 7.89 x10 <sup>-5</sup>       |
|            | Logistic        | 4        | 41.06        | -64.12        | 4.96          | 0.08        | 5.74 x10 <sup>-5</sup>       |
| Ortho-P    |                 |          |              |               |               |             |                              |
| After      | Null            | 2        | 25.43        | -44.86        | 8.52          | < 0.01      | 1.85 x10 <sup>-3</sup>       |
|            | <b>Linear</b>   | <b>3</b> | <b>32.09</b> | <b>-53.38</b> | <b>0.00</b>   | <b>0.65</b> | <b>4.21 x10<sup>-4</sup></b> |
|            | Asymptotic      | 4        | 33.79        | -49.57        | 3.81          | 0.10        | 2.89 x10 <sup>-4</sup>       |
|            | Logistic        | 4        | 34.69        | -51.39        | 1.99          | 0.24        | 2.23 x10 <sup>-4</sup>       |
| End        | Null            | 2        | 27.33        | -48.66        | 14.07         | < 0.01      | 1.21 x10 <sup>-3</sup>       |
|            | <b>Linear</b>   | <b>3</b> | <b>36.76</b> | <b>-62.72</b> | <b>0.00</b>   | <b>0.94</b> | <b>1.49 x10<sup>-4</sup></b> |
|            | Asymptotic      | 4        | 36.85        | -55.70        | 7.02          | 0.03        | 1.46 x10 <sup>-4</sup>       |
|            | Logistic        | 4        | 36.91        | -55.82        | 6.90          | 0.03        | 1.44 x10 <sup>-1</sup>       |
| Diesters   |                 |          |              |               |               |             |                              |
| After      | <b>Null</b>     | <b>2</b> | <b>41.79</b> | <b>-77.79</b> | <b>0.00</b>   | <b>0.91</b> | <b>4.88 x10<sup>-5</sup></b> |
|            | Linear          | 3        | 41.83        | -72.88        | 4.71          | 0.09        | 4.83 x10 <sup>-5</sup>       |
|            | Asymptotic      | 4        | 42.15        | -66.29        | 11.30         | < 0.01      | 4.51 x10 <sup>-5</sup>       |
|            | Logistic        | 4        | 42.36        | -66.72        | 10.86         | < 0.01      | 4.30 x10 <sup>-5</sup>       |
| End        | Null            | 2        | 33.51        | -61.01        | 1.54          | 0.14        | 3.08 x10 <sup>-4</sup>       |
|            | <b>Linear</b>   | <b>3</b> | <b>36.68</b> | <b>-62.56</b> | <b>0.00</b>   | <b>0.31</b> | <b>1.52 x10<sup>-4</sup></b> |
|            | Asymptotic      | 4        | 40.12        | -62.25        | 0.31          | 0.27        | 7.07 x10 <sup>-5</sup>       |
|            | Logistic        | 4        | 40.19        | -62.37        | 0.19          | 0.28        | 6.97 x10 <sup>-5</sup>       |
| Monoesters |                 |          |              |               |               |             |                              |
| After      | <b>Null</b>     | <b>2</b> | <b>19.74</b> | <b>-33.49</b> | <b>0.00</b>   | <b>0.53</b> | <b>6.55 x10<sup>-3</sup></b> |
|            | Linear          | 3        | 21.93        | -33.06        | 0.43          | 0.43        | 4.03 x10 <sup>-3</sup>       |
|            | Asymptotic      | 4        | 19.66        | -21.31        | 12.18         | < 0.01      | 6.68 x10 <sup>-3</sup>       |
|            | Logistic        | 4        | 22.98        | -27.97        | 5.52          | 0.03        | 3.19 x10 <sup>-3</sup>       |
| End        | Null            | 2        | 16.92        | -27.84        | 17.50         | < 0.01      | 1.23 x10 <sup>-2</sup>       |
|            | <b>Linear</b>   | <b>3</b> | <b>28.07</b> | <b>-45.34</b> | <b>0.00</b>   | <b>0.60</b> | <b>1.03 x10<sup>-3</sup></b> |
|            | Asymptotic      | 4        | 30.92        | -43.83        | 1.51          | 0.28        | 5.47 x10 <sup>-4</sup>       |
|            | Logistic        | 4        | 30.07        | -42.14        | 3.20          | 0.12        | 6.60 x10 <sup>-4</sup>       |

| middle:end Poly-P |                   |          |             |             |             |             |                              |
|-------------------|-------------------|----------|-------------|-------------|-------------|-------------|------------------------------|
| After             | Null              | 2        | 0.36        | 5.29        | 3.53        | 0.10        | 7.93 x10 <sup>-1</sup>       |
|                   | <b>Linear</b>     | <b>3</b> | <b>4.52</b> | <b>1.76</b> | <b>0.00</b> | <b>0.61</b> | <b>1.19 x10<sup>-1</sup></b> |
|                   | Asymptotic        | 4        | 6.70        | 4.60        | 2.84        | 0.15        | 1.12 x10 <sup>-1</sup>       |
|                   | Logistic          | 4        | 6.65        | 4.70        | 2.94        | 0.14        | 1.20 x10 <sup>-1</sup>       |
| End               | Null              | 2        | -1.84       | 9.68        | 8.14        | < 0.01      | 4.87 x10 <sup>-1</sup>       |
|                   | Linear            | 3        | 3.70        | 3.39        | 1.85        | 0.19        | 2.31 x10 <sup>-1</sup>       |
|                   | <b>Asymptotic</b> | <b>4</b> | <b>8.23</b> | <b>1.54</b> | <b>0.00</b> | <b>0.48</b> | <b>8.46 x10<sup>-2</sup></b> |
|                   | Logistic          | 4        | 7.85        | 2.29        | 0.75        | 0.33        | 9.12 x10 <sup>-2</sup>       |



**Table S4.**

Strength of periphyton biomass regression models measured as chlorophyll-a (Chl a), ash-free dry-mass (AFDM), and autotrophic index (AI) for samples collected 1-day before (Before), 1-day after (After), and 10-days after (End) experimental P additions. Second order Akaike's information criteria values (AICc), AICc differences relative to the best model ( $\Delta$ AICc), AICc weights (AICw), log-likelihood values (LL), number of estimated parameters (k), and residual deviance (Residual Dev.) are shown for each model. Bolded text represents the most plausible model.

| Chl <i>a</i> | Model         | k        | LL            | AICc          | $\Delta$ AICc | AICw        | Residual Dev.                |
|--------------|---------------|----------|---------------|---------------|---------------|-------------|------------------------------|
| Before       | <b>Null</b>   | <b>2</b> | <b>-10.06</b> | <b>26.13</b>  | <b>0.00</b>   | <b>0.90</b> | <b>4.93</b>                  |
|              | Linear        | 3        | -9.90         | 30.61         | 4.48          | 0.10        | 4.76                         |
|              | Asymptotic    | 4        | -11.06        | 40.12         | 13.99         | < 0.01      | 4.87                         |
|              | Logistic      | 4        | -9.98         | 37.95         | 11.82         | < 0.01      | 4.80                         |
| After        | <b>Null</b>   | <b>2</b> | <b>-9.55</b>  | <b>25.11</b>  | <b>0.00</b>   | <b>0.87</b> | <b>4.40</b>                  |
|              | Linear        | 3        | -9.08         | 28.96         | 3.85          | 0.13        | 3.96                         |
|              | Asymptotic    | 4        | -9.58         | 37.15         | 12.05         | < 0.01      | 4.43                         |
|              | Logistic      | 4        | -9.24         | 36.48         | 11.37         | < 0.01      | 4.11                         |
| End          | Null          | 2        | -19.49        | 44.98         | 8.87          | < 0.01      | 40.08                        |
|              | <b>Linear</b> | <b>3</b> | <b>-12.66</b> | <b>36.11</b>  | <b>0.00</b>   | <b>0.77</b> | <b>8.78</b>                  |
|              | Asymptotic    | 4        | -11.03        | 40.06         | 3.94          | 0.11        | 6.11                         |
|              | Logistic      | 4        | -11.00        | 40.00         | 3.88          | 0.11        | 6.07                         |
| <b>AFDM</b>  |               |          |               |               |               |             |                              |
| Before       | <b>Null</b>   | <b>2</b> | <b>10.52</b>  | <b>-15.05</b> | <b>0.00</b>   | <b>0.81</b> | <b>5.08 x10<sup>-2</sup></b> |
|              | Linear        | 3        | 11.45         | -12.10        | 2.95          | 0.19        | 4.14 x10 <sup>-2</sup>       |
|              | Asymptotic    | 4        | 10.85         | -3.70         | 11.35         | < 0.01      | 4.73 x10 <sup>-2</sup>       |
|              | Logistic      | 4        | 10.25         | -2.50         | 12.55         | < 0.01      | 5.40 x10 <sup>-2</sup>       |
| After        | <b>Null</b>   | <b>2</b> | <b>4.12</b>   | <b>-2.25</b>  | <b>0.00</b>   | <b>0.90</b> | <b>2.11 x10<sup>-1</sup></b> |
|              | Linear        | 3        | 4.27          | 2.25          | 4.50          | 0.09        | 2.04 x10 <sup>-1</sup>       |
|              | Asymptotic    | 4        | 4.19          | 9.63          | 11.88         | < 0.01      | 2.08 x10 <sup>-1</sup>       |
|              | Logistic      | 4        | 3.76          | 10.47         | 12.72         | < 0.01      | 2.28 x10 <sup>-1</sup>       |
| End          | Null          | 2        | -2.28         | 10.56         | 0.54          | 0.42        | 8.75 x10 <sup>-1</sup>       |
|              | <b>Linear</b> | <b>3</b> | <b>0.39</b>   | <b>10.02</b>  | <b>0.00</b>   | <b>0.55</b> | <b>4.83 x10<sup>-1</sup></b> |
|              | Asymptotic    | 4        | 0.64          | 16.71         | 6.69          | 0.02        | 4.57 x10 <sup>-1</sup>       |
|              | Logistic      | 4        | 0.66          | 16.67         | 6.65          | 0.02        | 4.55 x10 <sup>-1</sup>       |
